# Supplementary material for: Characterization of a Thermostable Endolysin of the Aeribacillus Phage AeriP45 as a Potential Staphylococcus Biofilm-Removing Agent
Source: MDPI journal article supplement (doi:10.3390/v16010093), 2024-01-07
Supplement: s1 [file s1]

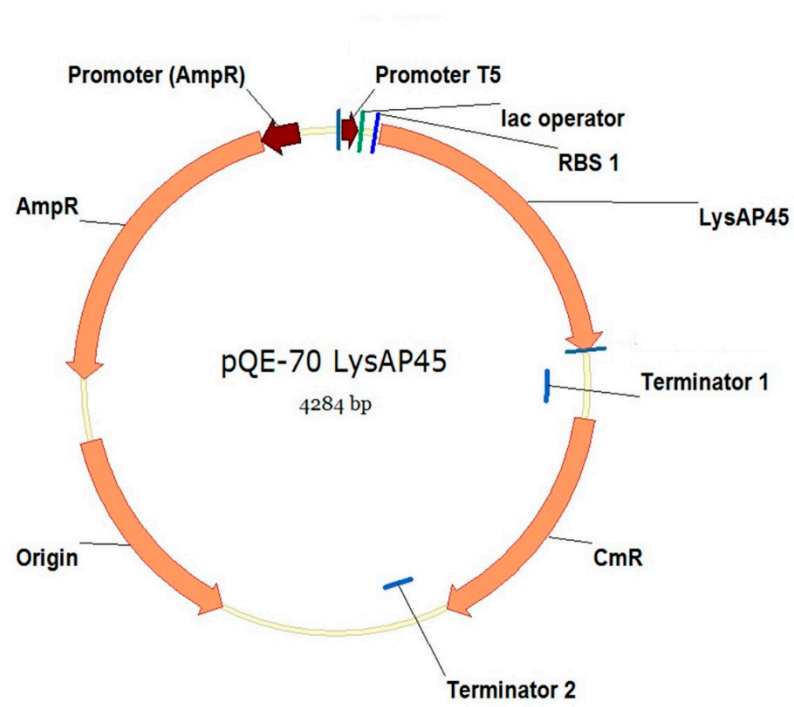

Figure S1. Map of the plasmid pQE-70/LysAP45. RBS-ribosome binding site. LysAP45 – gene encoded endolysin LysAP45. AmpR – ampicillin resistance gene.
