# Supplementary material for: Characterization of a Thermostable Endolysin of the Aeribacillus Phage AeriP45 as a Potential Staphylococcus Biofilm-Removing Agent
Source: MDPI journal article supplement (doi:10.3390/v16010093), 2024-01-07
Supplement: s1 [file s1]

**Table S1.** Sensitivity of *Staphylococcus* strains to antibiotics and the AP45 phage

| Resistance to Antibiotics     |                           |      |              |                                |      |                                 |      |                            |        |                                  |      |
|-------------------------------|---------------------------|------|--------------|--------------------------------|------|---------------------------------|------|----------------------------|--------|----------------------------------|------|
| Antibiotic disc               | <i>S. aureus</i><br>CEMTC |      |              | <i>S. epidermidis</i><br>CEMTC |      | <i>S. haemolyticus</i><br>CEMTC |      | <i>S. warneri</i><br>CEMTC |        | <i>S. saprophyticus</i><br>CEMTC |      |
|                               | 675                       | 1685 | 1733         | 2043                           | 2079 | 3413                            | 3753 | 2062                       | 4154   | 3872                             | 6829 |
| <b>β-lactams</b>              | FOX                       | s    | P,<br>OX/FOX | CFM                            | FOX  | FOX                             | FOX  | s                          | P      | s                                | P    |
| <b>Aminoglycosides</b>        | CN                        | s    | CN           | s                              | s    | AK, CN                          | s    | s                          | AK, CN | s                                | s    |
| <b>Macrolides</b>             | E,                        | s    | E            | E                              | E    | E                               | E    | E                          | s      | s                                | s    |
| <b>Lincosamides</b>           | DA                        | LNM  | s            | s                              | s    | s                               | s    | s                          | s      | s                                | s    |
| <b>Fluoroquinolones</b>       | s                         | s    | CIP,<br>LEV, | CIP,<br>LEV,                   | s    | s                               | s    | s                          | s      | s                                | s    |
| <b>Chloramphenicol</b>        | s                         | s    | C            | C                              | s    | s                               | s    | s                          | s      | s                                | s    |
| <b>Tetracyclines</b>          | s                         | s    | s            | s                              | s    | s                               | s    | s                          | s      | s                                | s    |
| <b>Glycopeptides</b>          | s                         | VA   | s            | VA                             | s    | s                               | s    | s                          | s      | s                                | s    |
| <b>Oxazolidinones</b>         | s                         | s    | s            | s                              | s    | s                               | s    | s                          | s      | s                                | s    |
|                               | MDR                       | R    | MDR          | MDR                            | R    | MDR                             | R    | R                          | R      | S                                | R    |
| Sensitivity to the AP45 phage |                           |      |              |                                |      |                                 |      |                            |        |                                  |      |
| <b>AP45 phage</b>             | i                         | i    | i            | i                              | i    | i                               | i    | i                          | i      | i                                | i    |

FOX – Cefoxitin; P – Penicillin; OX – Oxacillin; CFM – Cefixime; AK – Amikacin; CN – Gentamicin; E – Erythromycin; DA – Clindamycin; LNM – Lincomycin; CIP – Ciprofloxacin, LEV – Levofloxacin; C – Chloramphenicol; VA – Vancomycin. S – sensitive, i – insensitive
