# Supplementary material for: Characterization of a Thermostable Endolysin of the Aeribacillus Phage AeriP45 as a Potential Staphylococcus Biofilm-Removing Agent
Source: MDPI journal article supplement (doi:10.3390/v16010093), 2024-01-07
Supplement: s1 [file s1]

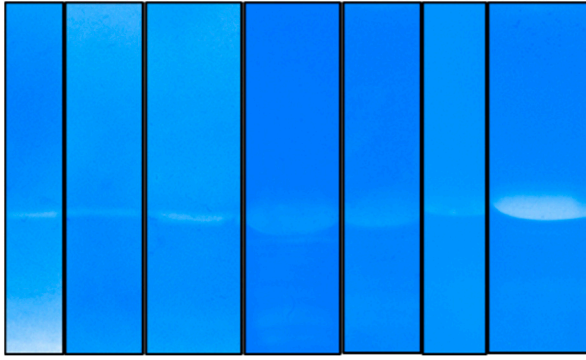

**Figure S2.** Zymographic analysis of recombinant LysAP45. PAGE (12,5%) containing 0.5 mg of peptidoglycan from *S. aureus* CEMTC 1733 (A), *S. epidermidis* CEMTC 2079 (B), *S. haemolyticus* CEMTC 3753 (C), *S. warneri* CEMTC 2062 (D), *S. warneri* CEMTC 4154 (E), *S. saprophyticus* CEMTC 3872 (F), and *S. saprophyticus* CEMTC 6829 (G) stained with methylene blue.
